# Supplementary material
Source: Springer Nature journal article supplement (https://www.springermedizin.de/resource/supplementary/13058_2009_2536_MOESM11_ESM.pdf/9701642)

**A****D609****t0****1h****5h****24h****HER3**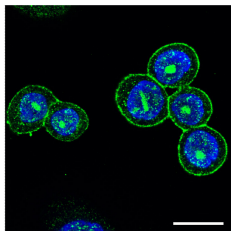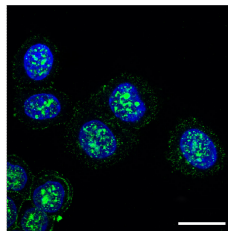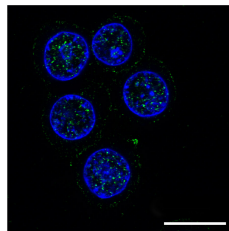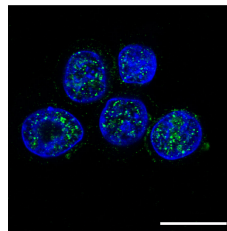**EGFR**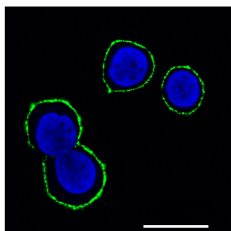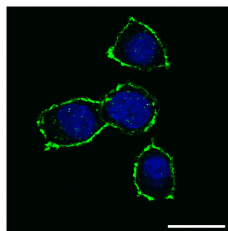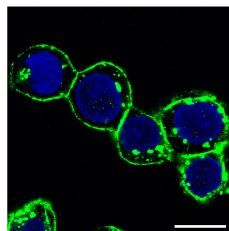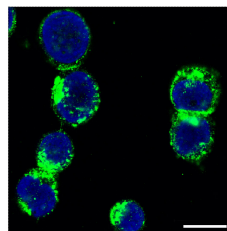**B**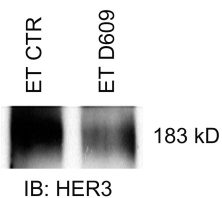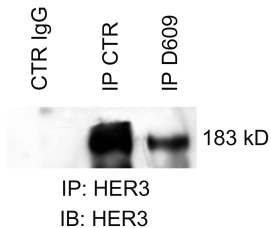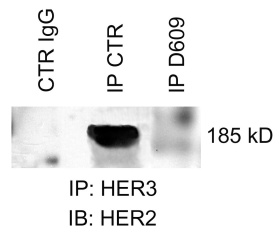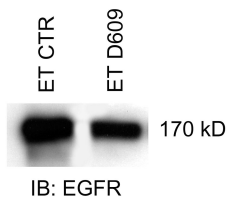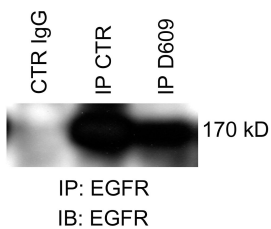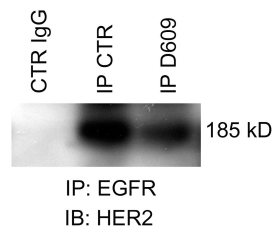

Supplement: MOESM11 [file 9701642]
